# Supplementary material
Source: PubMed Central journal article supplement (PMC6591723)
Supplement: NIHMS1034276-supplement-Supplemental_File.pdf [file NIHMS1034276-supplement-Supplemental_File.pdf]

## Supplementary Figure 1

**A**

```

gi|34740329|ref|NP_919223.1| GGNFG-GRGGYGGGGGS---RGSYGGGDGGYNG---FGGDGGNYGGG 280
gi|4504445|ref|NP_002127.1| GGNFS-GRGGFGGSRGG---GGYGGSGDGYNG---FGNDGSNFGGG 257
gi|4504447|ref|NP_002128.1| GRGFPGDYNGYGGGPPGGNFGGSPGYGGGRGGYGGGGPGYGNQGGGYGGG 274
* . * . * . * : * : * . * * . * * * . * * * * : * . : * . . : * * *

gi|34740329|ref|NP_919223.1| PGYSSRGGYGGGGPGYGNQGGGYGGGGYDGYNEGGNFGGGNYGGGGNYN 330
gi|4504445|ref|NP_002127.1| -----GSYN 261
gi|4504447|ref|NP_002128.1| YDNYGGGNYGS-----GNYN 289
* . * *

gi|34740329|ref|NP_919223.1| DFGNYSGQQQSNYGPMKGGFSG-RSSGSPYGGG-----YGS 367
gi|4504445|ref|NP_002127.1| DFGNYN-NQSSNFGPMKGGNFGG-RSSG-PYGGGGQYFAKPRNQGGYGS 308
gi|4504447|ref|NP_002128.1| DFGNYN-QQPSNYGPMKSGNFGGSRNMGGPYGGG-----NYGPGGS 329
***** . : * * : * * * . * . * * * * * . * * * * * * * * * * *

```

**B**

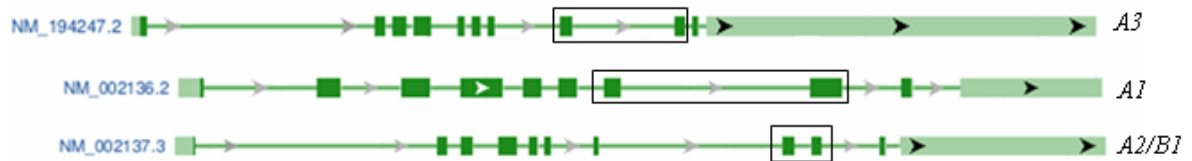

**A.** ClustalW alignment of the human hnRNP A3, A1 and A2B1 proteins. The predicted Prion-Like domains are boxed.

**B.** Graphical representation of exon-intron structures and UTR regions of *hnRNP A3*, *A1* and *A2/B1* genes is shown. The exons encoding the predicted Prion-Like domain is shown.
